# Supplementary material for: Effect of Household Type on the Prevalence of Climacteric Syndrome among Middle-Aged Men
Source: MDPI journal article supplement (doi:10.3390/healthcare11192684), 2023-10-05
Supplement: s1 [file s1]

# Effect of Household Type on the Prevalence of Climacteric Syndrome among Middle-Aged Men

**Table S1.** General characteristics associated with climacteric syndrome based on aging males' symptoms subscale.

| Variable          |               | Psychological subscale |           | Somatic subscale |           | Sexual subscale |           |
|-------------------|---------------|------------------------|-----------|------------------|-----------|-----------------|-----------|
|                   |               | <i>n</i> (%)           | <i>p</i>  | <i>n</i> (%)     | <i>p</i>  | <i>n</i> (%)    | <i>p</i>  |
| Age               | Less than 50  | 370(86.2)              | 0.328     | 371(86.5)        | 0.005**   | 400(93.2)       | <0.001*** |
|                   | 50 or more    | 680(88.2)              |           | 706(91.6)        |           | 752(97.5)       |           |
| Education level   | University    | 846(86.6)              | 0.046*    | 866(88.6)        | 0.008**   | 963(95.8)       | 0.467     |
|                   | High school   | 204(91.5)              |           | 211(94.6)        |           | 216(96.9)       |           |
| Occupation        | White-collar  | 829(87.2)              | 0.501     | 846(89.0)        | 0.077     | 911(95.8)       | 0.476     |
|                   | Blue-collar   | 221(88.8)              |           | 231(92.8)        |           | 241(96.8)       |           |
| Income level      | High          | 519(86.2)              | 0.176     | 535(88.9)        | 0.313     | 575(95.5)       | 0.390     |
|                   | Low           | 531(88.8)              |           | 542(90.6)        |           | 577(96.5)       |           |
| Smoking status    | Non-smoker    | 603(87.1)              | 0.659     | 605(87.4)        | 0.002**   | 664(96.0)       | 0.924     |
|                   | Smoker        | 447(88.0)              |           | 472(92.9)        |           | 488(96.1)       |           |
| Drinking behavior | Low-risk      | 829(87.1)              | 0.389     | 849(89.2)        | 0.203     | 910(95.6)       | 0.154     |
|                   | High-risk     | 221(89.1)              |           | 228(91.9)        |           | 242(97.6)       |           |
| Physical activity | Adequate      | 199(89.2)              | 0.385     | 193(86.5)        | 0.081     | 221(99.1)       | 0.009**   |
|                   | Inadequate    | 851(87.1)              |           | 884(90.5)        |           | 931(95.3)       |           |
| Sleep duration    | Sufficient    | 536(89.2)              | 0.077     | 534(88.9)        | 0.304     | 579(96.3)       | 0.548     |
|                   | Insufficient  | 514(85.8)              |           | 543(90.7)        |           | 573(95.7)       |           |
| BMI               | Normal        | 596(86.8)              | 0.366     | 613(89.2)        | 0.491     | 666(95.5)       | 0.295     |
|                   | Obesity       | 454(88.8)              |           | 464(90.4)        |           | 496(96.7)       |           |
| Household type    | Multi-person  | 502(83.7)              | <0.001*** | 519(86.5)        | <0.001*** | 572(95.3)       | 0.239     |
|                   | Single-person | 548(91.3)              |           | 558(93.0)        |           | 580(96.7)       |           |

\**p*< 0.05, \*\**p*< 0.01, \*\*\**p*< 0.001.

**Table S2.** Dietary factor associated with climacteric syndrome based on aging males' symptoms subscale.

| Variables           |                            | Psychological subscale |           | Somatic subscale |          | Sexual subscale |          |
|---------------------|----------------------------|------------------------|-----------|------------------|----------|-----------------|----------|
|                     |                            | <i>n</i> (%)           | <i>p</i>  | <i>n</i> (%)     | <i>p</i> | <i>n</i> (%)    | <i>p</i> |
| Breakfast frequency | Five or more times a week  | 320(81.0)              | <0.001*** | 338(85.6)        | 0.001**  | 377(95.4)       | 0.490    |
|                     | Four or fewer times a week | 730(90.7)              |           | 739(91.8)        |          | 775(96.3)       |          |
| Shared breakfast    | Together                   | 274(82.8)              | 0.002**   | 287(86.7)        | 0.032*   | 314(94.9)       | 0.215    |
|                     | Alone                      | 776(89.3)              |           | 790(90.9)        |          | 838(96.4)       |          |
| Lunch frequency     | Five or more times a week  | 900(87.9)              | 0.324     | 919(89.7)        | 0.991    | 984(96.1)       | 0.689    |
|                     | Four or fewer times a week | 150(85.2)              |           | 158(89.8)        |          | 168(95.5)       |          |
| Shared lunch        | Together                   | 734(87.2)              | 0.600     | 764(90.7)        | 0.084    | 812(96.4)       | 0.236    |
|                     | Alone                      | 316(88.3)              |           | 313(87.4)        |          | 340(95.0)       |          |
| Dinner frequency    | Five or more times a week  | 795(85.0)              | <0.001*** | 825(88.2)        | 0.001**  | 889(95.1)       | 0.002**  |
|                     | Four or fewer times a week | 255(96.2)              |           | 252(95.1)        |          | 263(99.2)       |          |
| Shared dinner       | Together                   | 618(86.0)              | 0.048*    | 630(87.6)        | 0.003**  | 688(95.7)       | 0.501    |
|                     | Alone                      | 432(89.8)              |           | 447(92.9)        |          | 464(96.5)       |          |
| Eating out          | Two or fewer times a week  | 524(85.1)              | 0.009**   | 539(87.5)        | 0.008**  | 588(95.5)       | 0.322    |
|                     | Three or more times a week | 526(90.1)              |           | 538(92.1)        |          | 564(96.6)       |          |

\**p*< 0.05, \*\**p*< 0.01, \*\*\**p*< 0.001.
